# Supplementary material for: Alpha Radiation as a Way to Target Heterochromatic and Gamma Radiation-Exposed Breast Cancer Cells
Source: MDPI journal article supplement (doi:10.3390/cells9051165), 2020-05-08
Supplement: s1 [file s1]

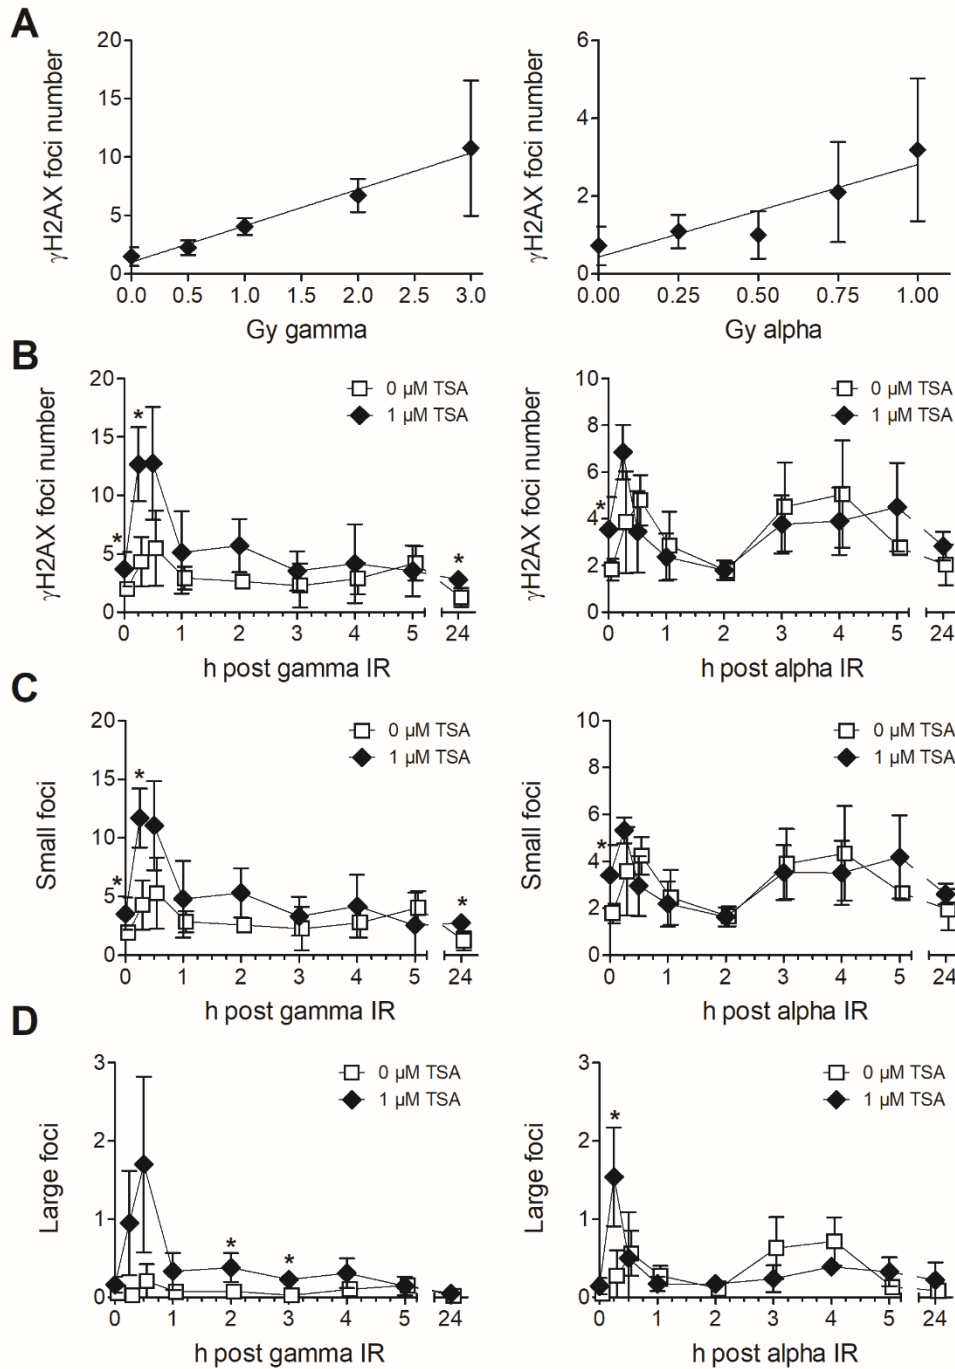

**Supplemental Figure S1.** Data represent original foci numbers, without subtraction of control values as in Figure 2. (A) The dose response of gamma and alpha radiation was evaluated at 30 min post irradiation by analysis of the  $\gamma$ H2AX foci number in MDA-MB-231 cells. (B) The repair kinetics of  $\gamma$ H2AX foci are presented from 15 min up to 24 h post exposure to 2 Gy of gamma or 0.75 Gy of alpha radiation in MDA-MB-231 cells pretreated with 1  $\mu$ M TSA for 18 h. The numbers of small (C) and large (D) foci are displayed, using the data from (Figure 2c). \*;  $p < 0.05$  versus 0  $\mu$ M TSA.

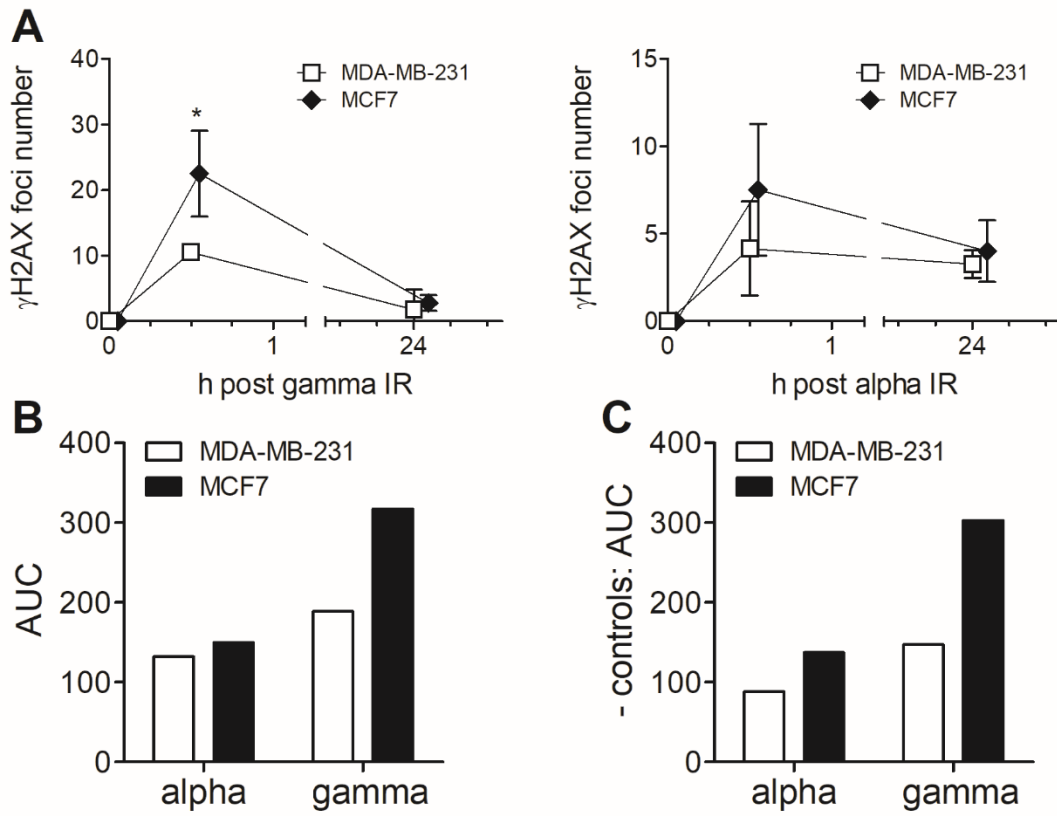

**Supplemental Figure S2.** (A)  $\gamma$ H2AX foci numbers (with foci numbers for controls subtracted) are presented at 30 min and 24 h post exposure to 6 Gy of gamma or 2 Gy of alpha radiation in MDA-MB-231 and MCF7 cells. \*;  $p < 0.05$ , versus MDA-MB-231. Areas under the curve (AUC) values are presented for the  $\gamma$ H2AX foci numbers from Figure 6 (B) as well as the subtracted ones from A (C).
